# Supplementary material
Source: PubMed Central journal article supplement (PMC7351479)
Supplement: abb8097_SM.pdf [file abb8097_SM.pdf]

## Supplementary Materials for

### **Structure-based drug designing and immunoinformatics approach for SARS-CoV-2**

Pritam Kumar Panda\*, Murugan Natarajan Arul, Paritosh Patel, Suresh K Verma, Wei Luo, Horst-Günter Rubahn, Yogendra Kumar Mishra, Mrutyunjay Suar, Rajeev Ahuja\*

\*Corresponding author. Email: [rajeev.ahuja@physics.uu.se](mailto:rajeev.ahuja@physics.uu.se); [pritam.panda@physics.uu.se](mailto:pritam.panda@physics.uu.se)

Published 24 June 2020, *Sci. Adv.* **6**, eabb8097 (2020)  
DOI: 10.1126/sciadv.abb8097

#### **This PDF file includes:**

Figs. S1 to S7  
Tables S1 to S2

#### **Other Supplementary Material for this manuscript includes the following:**

(available at [advances.sciencemag.org/cgi/content/full/sciadv.abb8097/DC1](https://advances.sciencemag.org/cgi/content/full/sciadv.abb8097/DC1))

Datafiles S1-S4

## Supplementary Figures

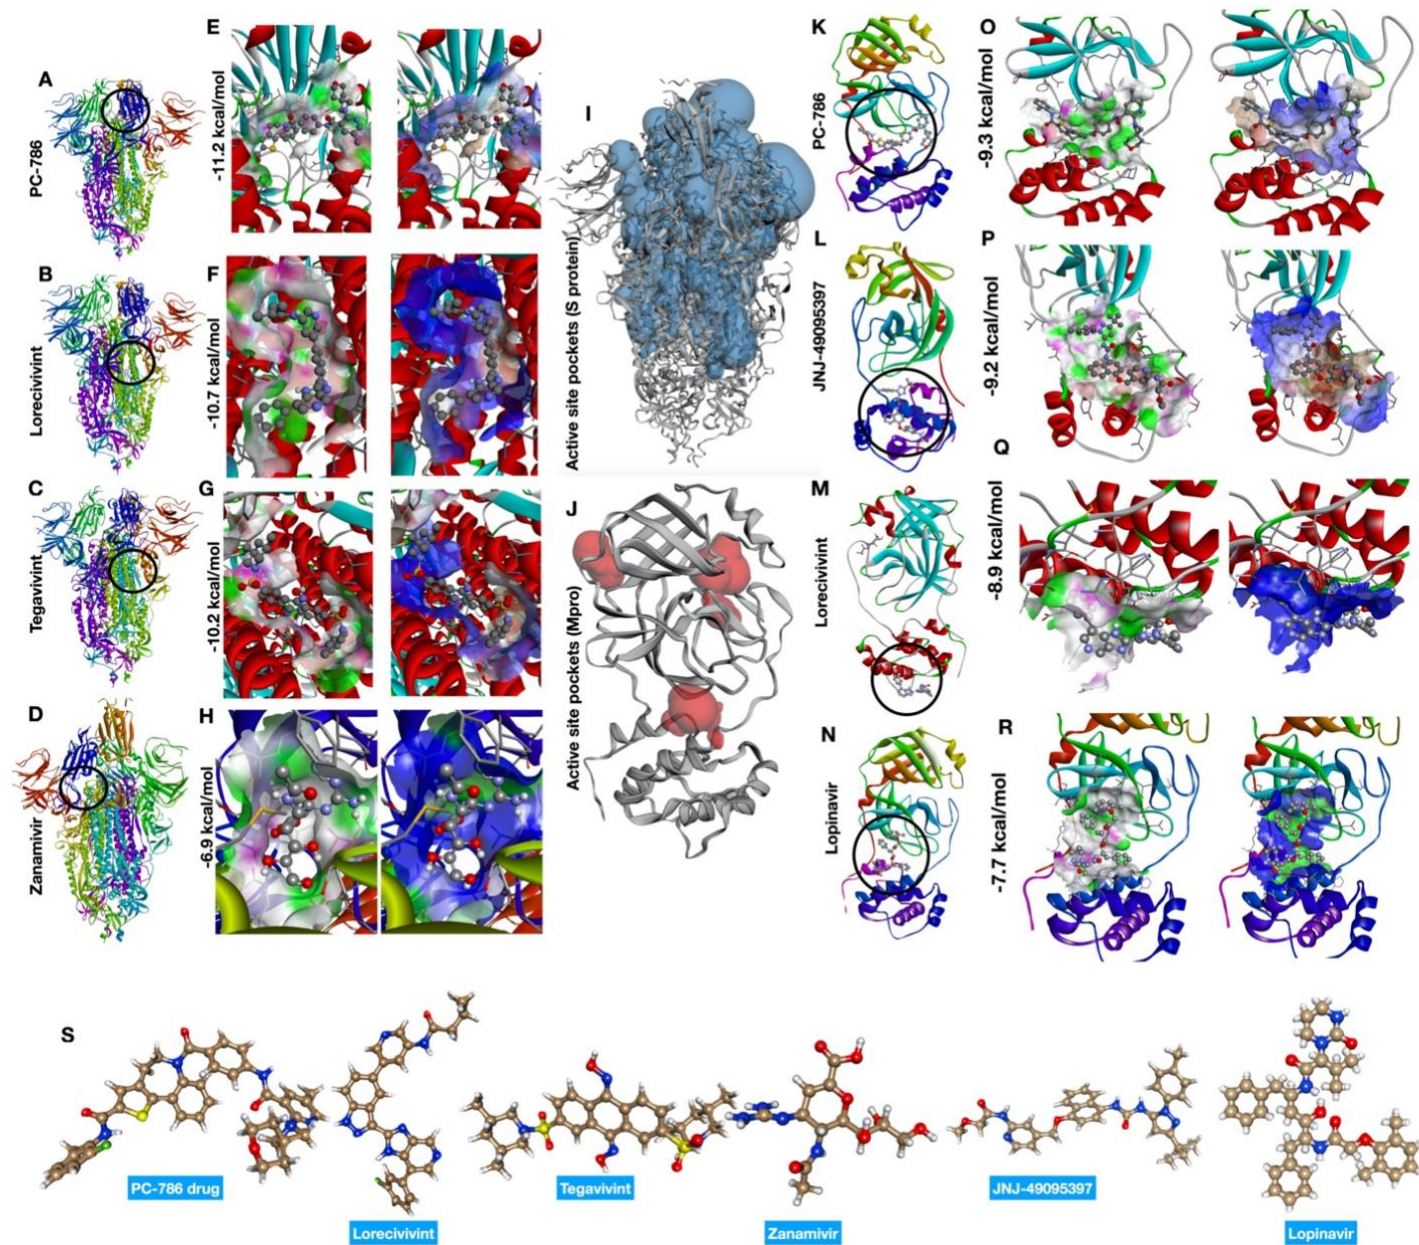

46 **Fig S1: Molecular docking analyses of antiviral compounds against S and M<sub>pro</sub> proteins of**  
 47 **SARS-CoV-2 (A-D) Molecular docking interaction of antiviral drugs to the trimeric S protein.**  
 48 **(E-H). Close view of the binding modes of antiviral drugs to the S protein with hydrogen bonding**  
 49 **and solvent accessible surface area. (I-J) Active site pockets of the trimeric S protein (blue) and**  
 50 **M<sub>pro</sub> (red) analyzed using CastP. (K-N). Binding modes of antiviral drugs to the M<sub>pro</sub>. (O-R)**  
 51 **Close view of the binding modes of antiviral drugs to the M<sub>pro</sub> with hydrogen bonding and solvent**  
 52 **accessible surface area. (S) 3D structure of the best screened and FDA approved antiviral**  
 53 **compounds.**

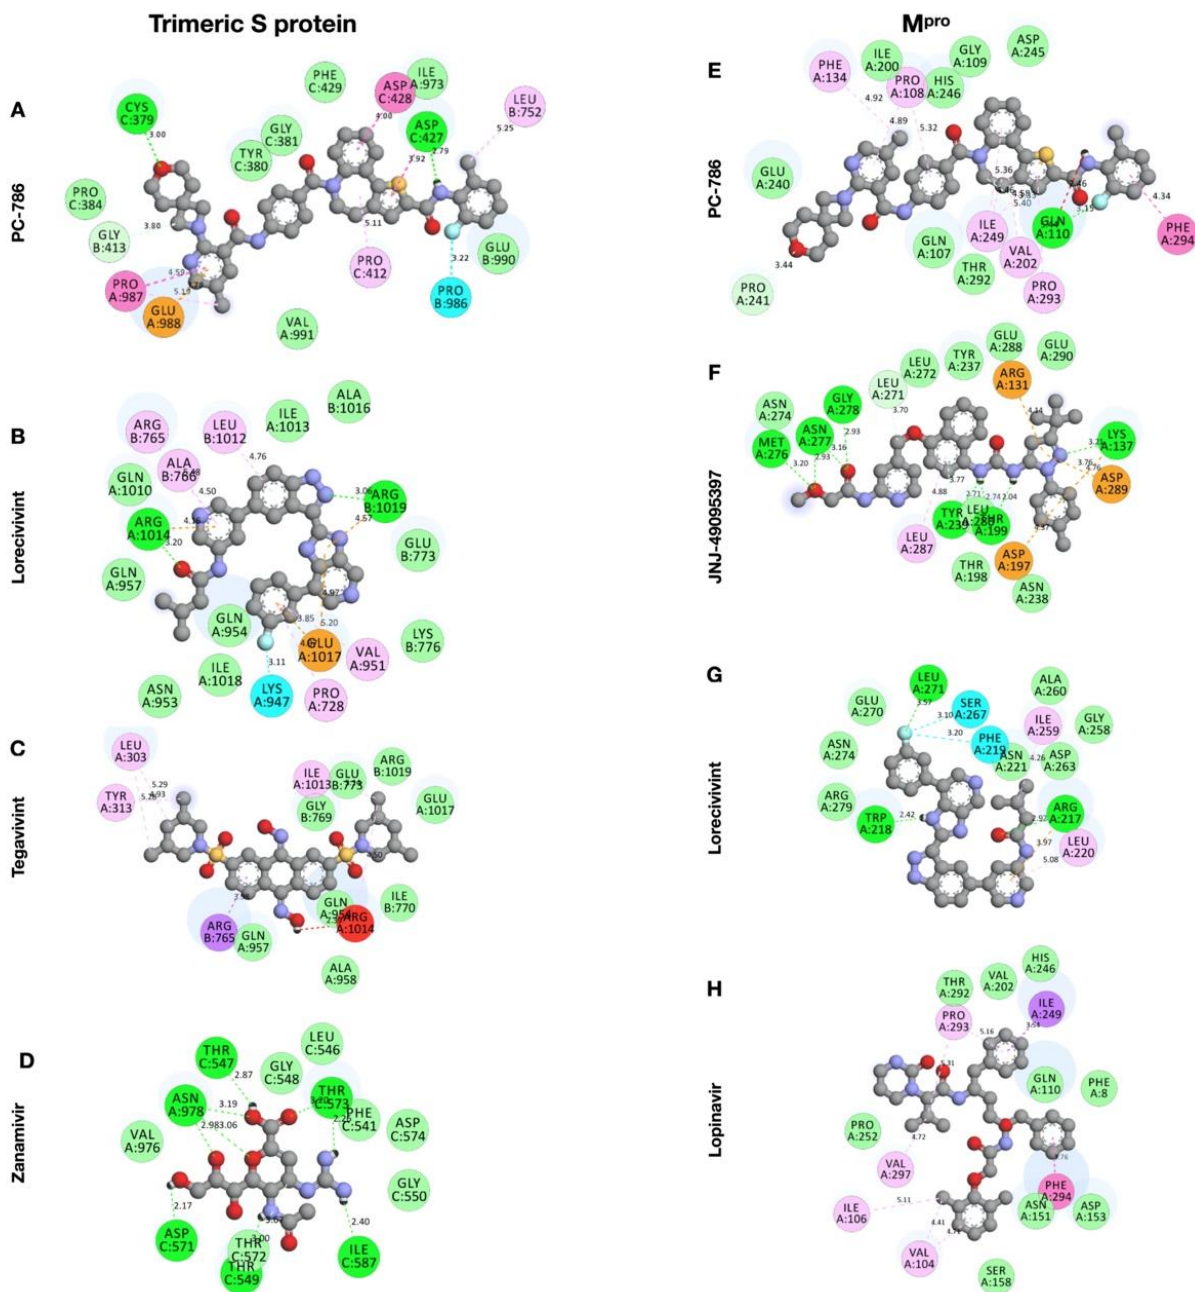

54  
55  
56 **Fig S2: 2D interaction plot of the antiviral drug compounds bound to trimeric S protein and**  
57 **M<sub>pro</sub>. (A-D) Interaction of best-selected compounds with one FDA approved drug Zanamivir for**  
58 **trimeric S protein. (E-H) 2D representation of antiviral drugs with one FDA approved drug**  
59 **Lopinavir for M<sub>pro</sub>.**

60  
61





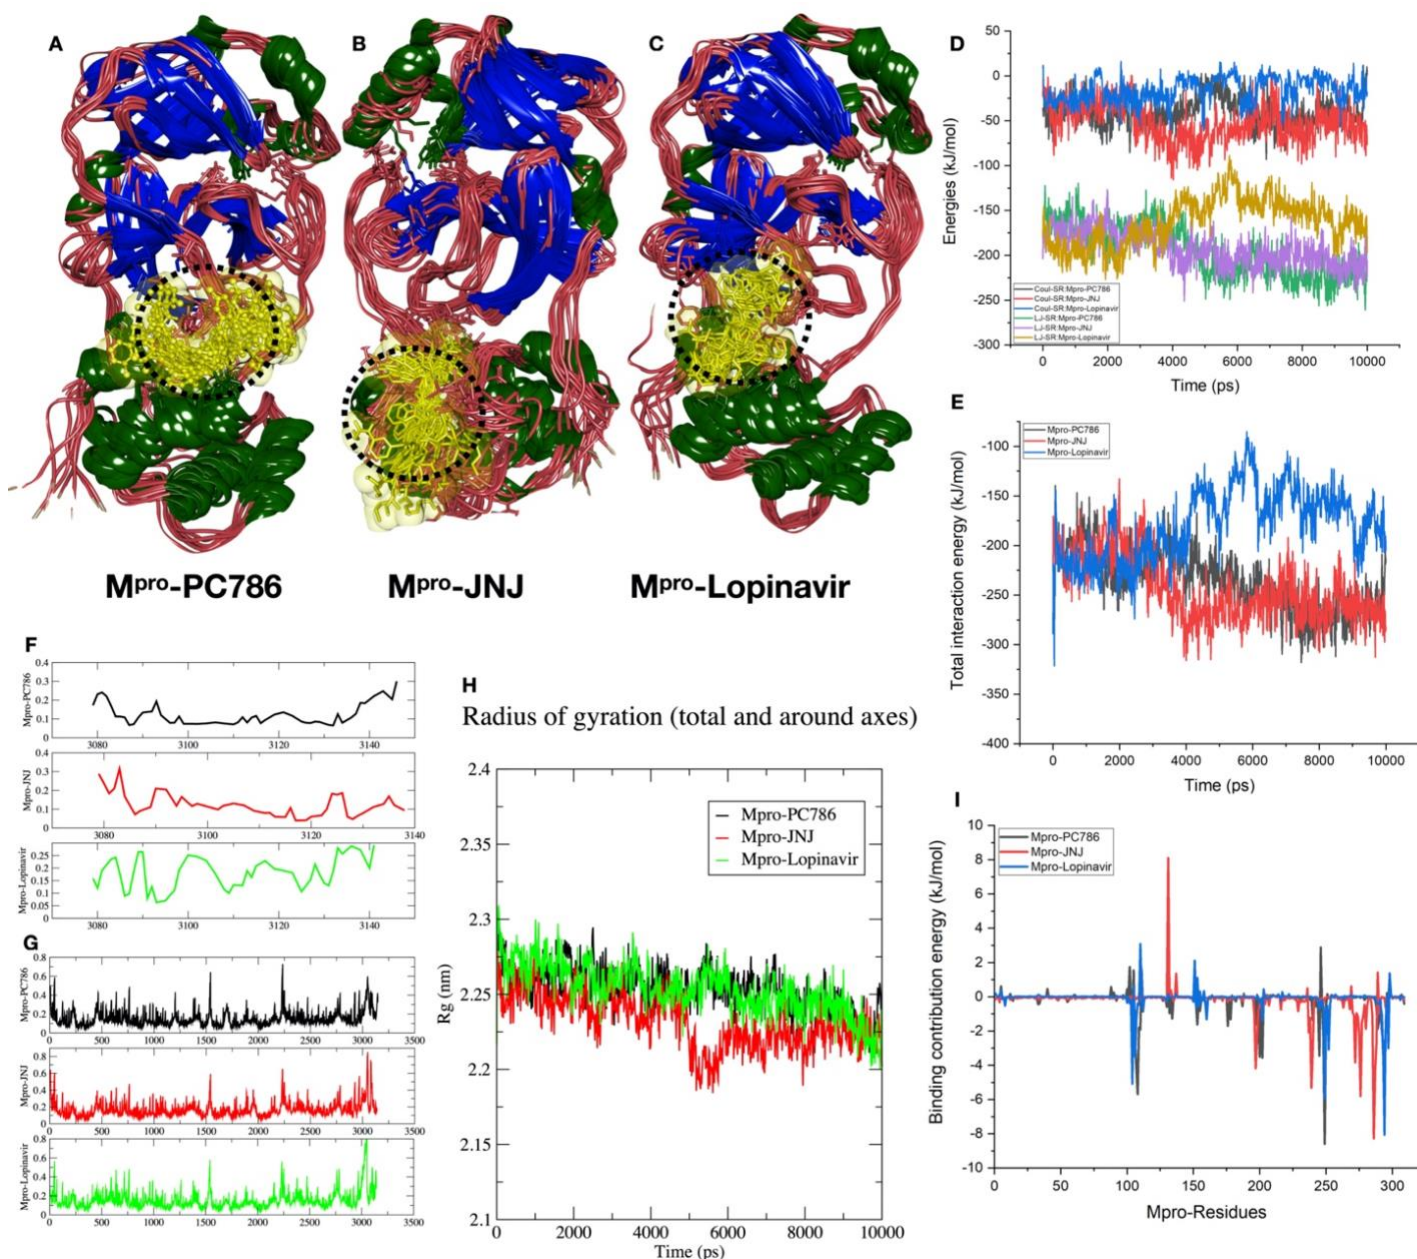

74  
75  
76  
77  
78  
79  
80  
81  
82  
83  
84

**Fig S4: Molecular dynamics simulation of M<sub>pro</sub> protein bound to antiviral drugs (A, B, C)** Cluster of 10ns simulated M<sub>pro</sub> conjugated with PC786, JNJ, and Lopinavir antiviral compounds. **(D, E)** Energies are corresponding to short-range Coulombic interaction energy (kJ/mol), Lennard-Jones energy (kJ/mol), and total interaction energies (kJ/mol). **(F, G)** Root Mean Square Fluctuation (RMSF) analysis of antiviral drug and the complex during 10ns simulation. **(H)** The radius of gyration depicting the compactness of the protein during the 10ns simulation. **(I)** The energy contribution of residues towards binding to the drug calculated using MM-PBSA during the 10ns simulation.



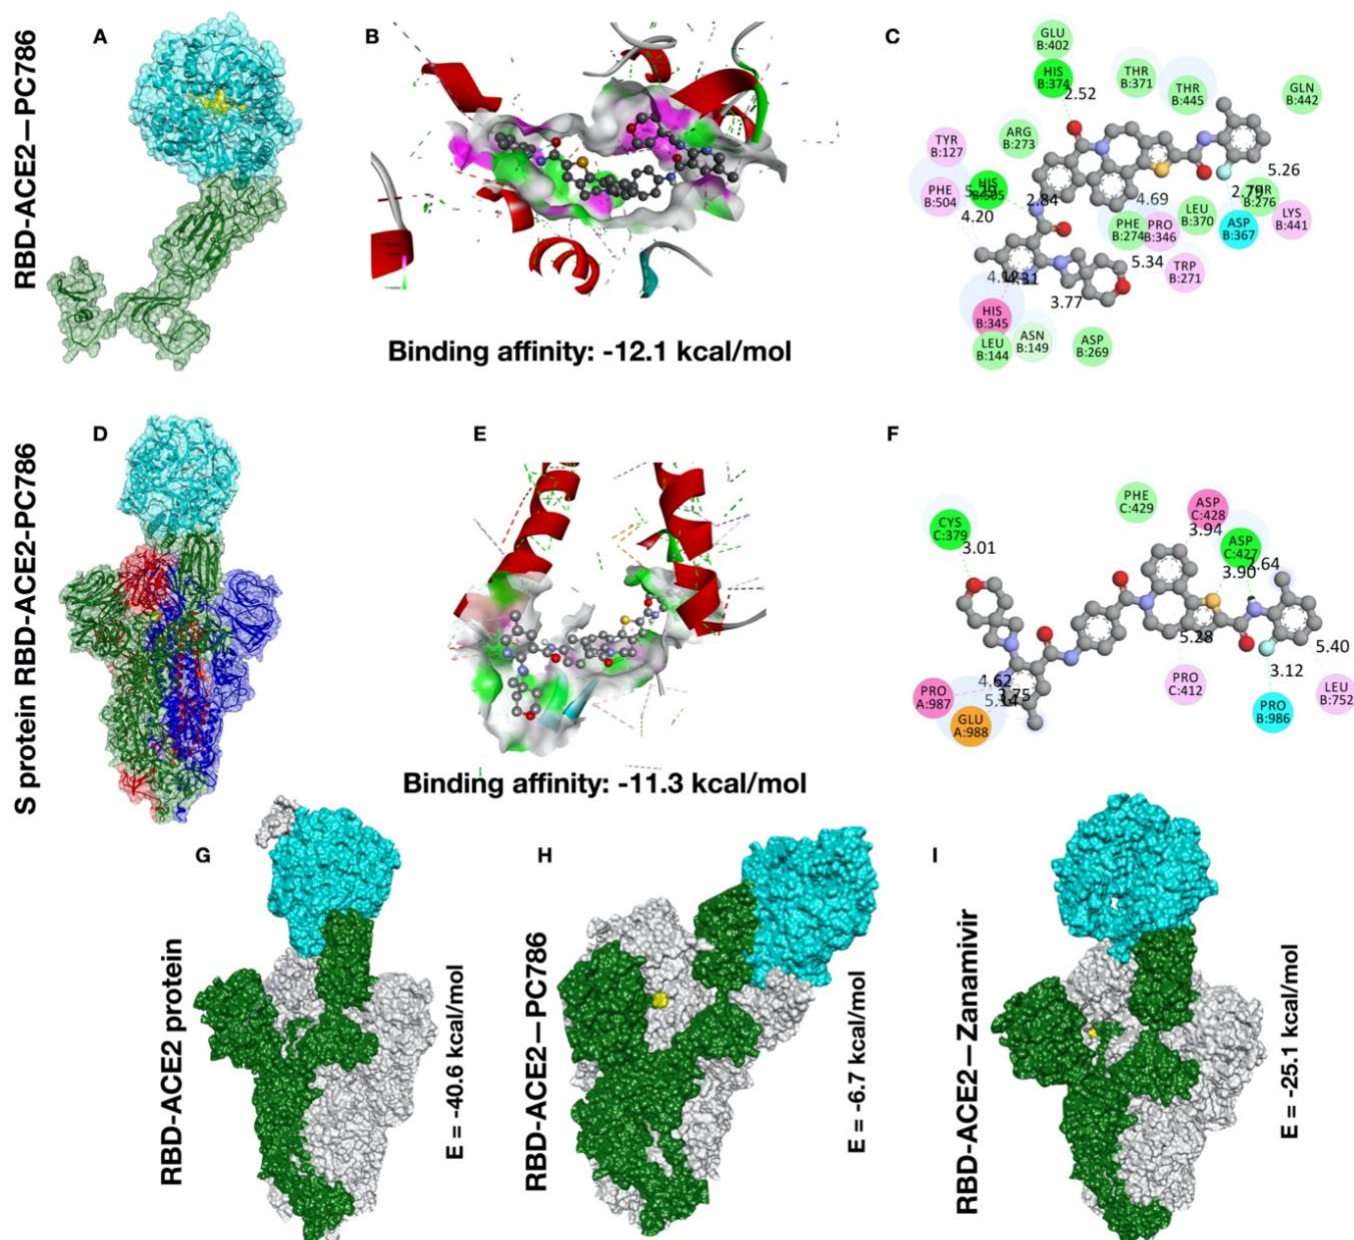

85

86

87 **Fig S5: Inhibition of S protein RBD domain complexed with ACE2** (A) Complex of S protein  
 88 RBD-ACE2 bound to PC786. (B) Close view of the interaction of PC786 to the complex. (C) 2D  
 89 representation of the interaction involving key residues. (D) Full complex of trimeric S protein  
 90 RBD domain-ACE2 conjugated with PC786 drug. (E) Close view of the interaction of PC786 to  
 91 the complex. (F) 2D representation of the interaction involving key residues. (G) Trimeric S  
 92 protein RBD domain binding to ACE2 in a closed conformation (H) Open conformation of  
 93 PC786 drug conjugate full RBD-ACE2 complex. (I) Closed conformation of Zanamivir drug  
 94 conjugate with full RBD-ACE2 complex.

95

96

97

98

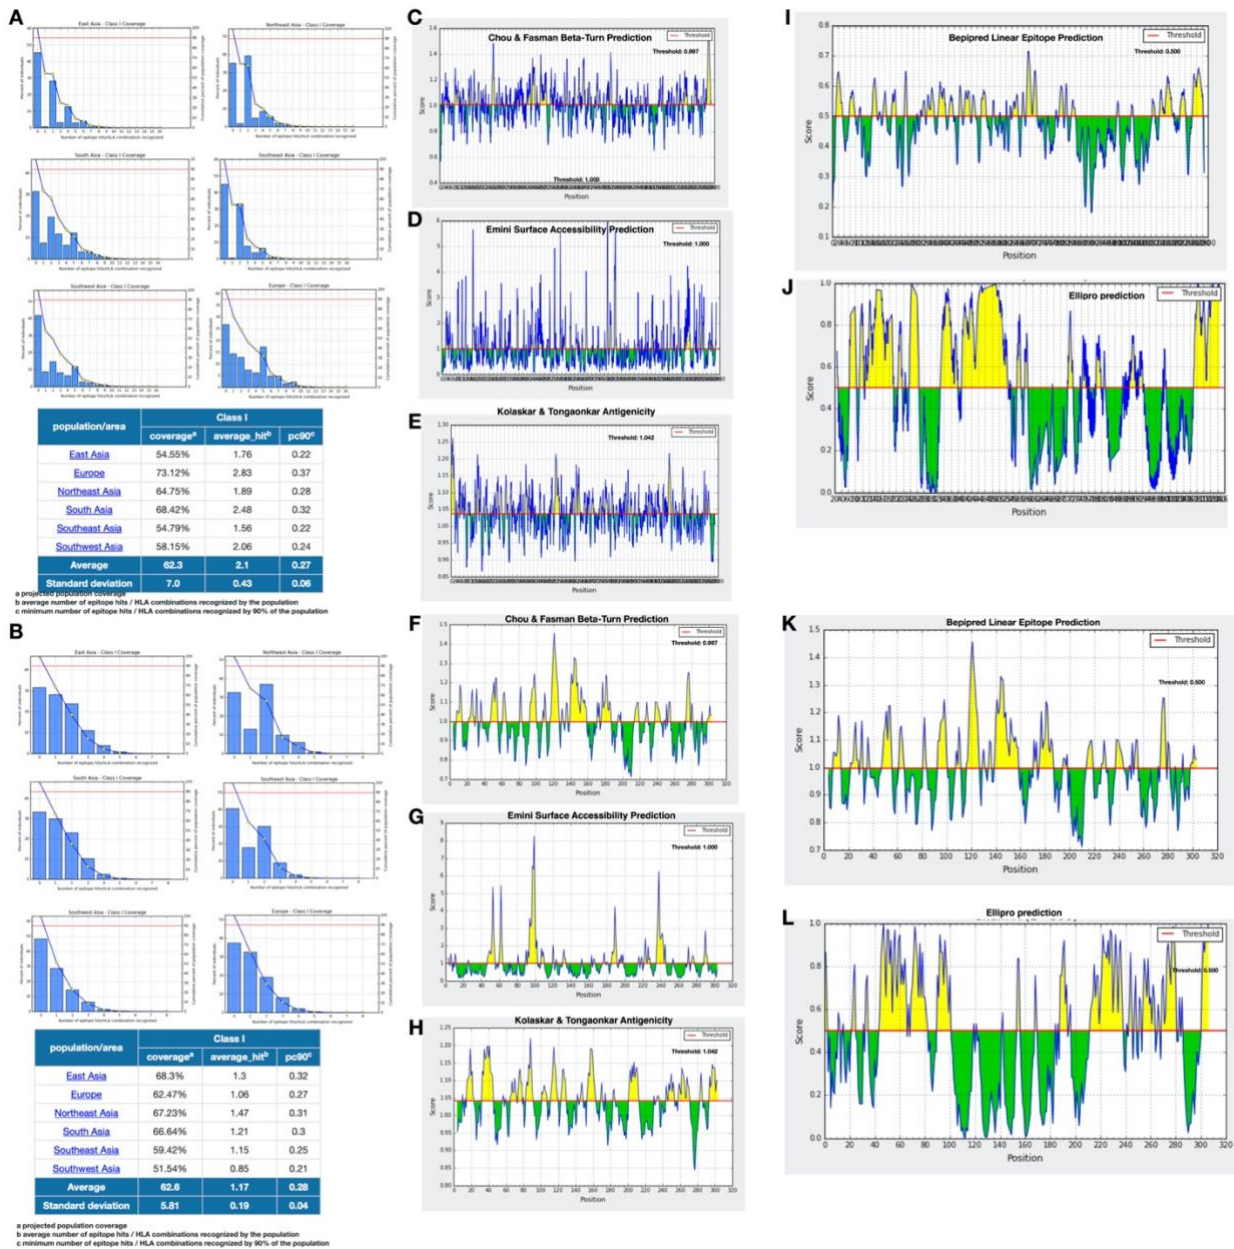

**Fig S6: Immunoinformatics approach for finding T cell and B cell epitopes from S protein and M<sub>pro</sub> of SARS-CoV-2, respectively.** (A, B) Population coverage analysis of the T cell epitopes predicted from S protein and M<sub>pro</sub> of SARS-CoV-2, respectively, with the percentage of coverage and average hits of the T cell epitopes across the continents. Linear B cell epitope sequence properties i.e., (C and F) Chou & Fasman beta-turn prediction analysis of B cell epitopes (D and G) Emini surface accessibility prediction (E and H) Kolaskar & Tongaonkar antigenicity prediction for S protein and M<sub>pro</sub>, respectively. (I and K) B cell linear epitope prediction using BepiPred server from IEDB tools for S and M<sub>pro</sub>, respectively. (J and L) Ellipro prediction for S and M<sub>pro</sub> respectively.



116  
117  
118

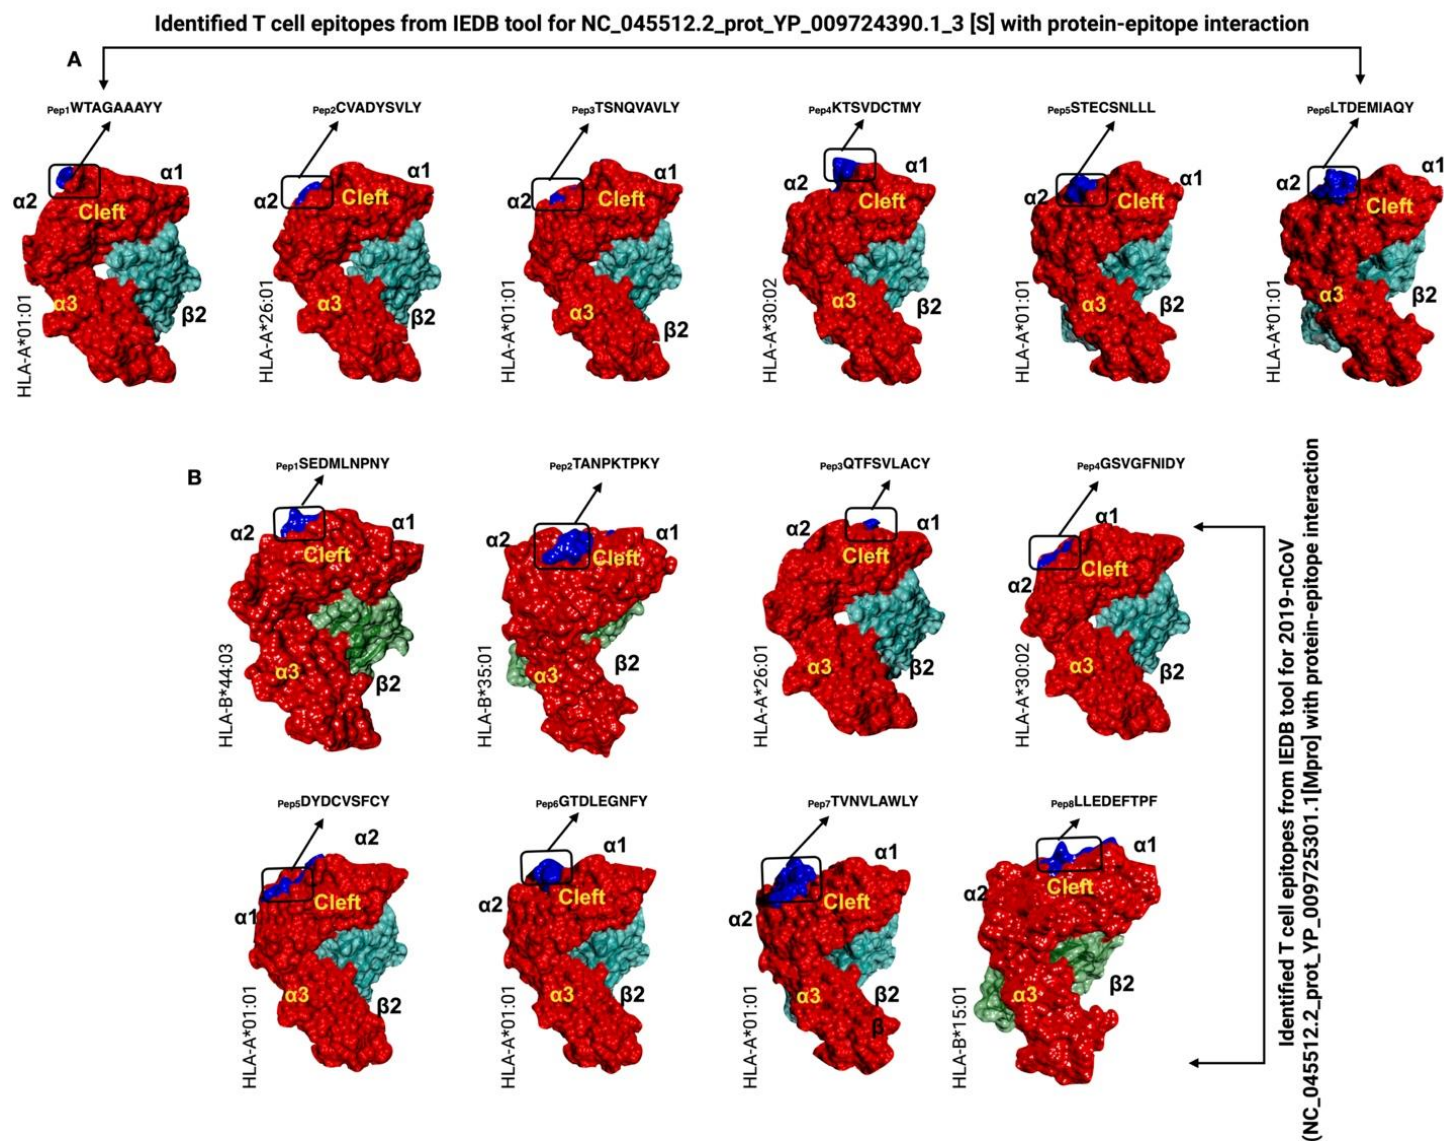

119  
120  
121  
122  
123  
124  
125

**Fig S7: T cell epitope interaction with MHC class I HLA alleles (A, B)** Predicted T cell epitopes (blue surface) from S protein (Pep1-Pep6) (top) and M<sub>pro</sub> (Pep1-Pep8) (below) interaction with different HLA-A class I antigens (red surface) using ClusPro 2.0 respectively. The T cell epitopes bind in the cleft (peptide-binding groove) between the two  $\alpha$  domains and  $\beta$  microglobulin.



**Table S1: Identified T cell epitopes from IEDB tool for NC\_045512.2\_prot\_YP\_009724390.1\_3 [S] protein with protein-epitope interaction energies.**

| No | Antigenic Peptides | Cluspro Lowest Energies |                | Allelic specificity                                                                    | MHC Class I Immunogenicity Score | NETMHC Plan Binding level | Antigenic Peptide selectivity                  | MHC Binding Affinity | C-Terminal Cleavage Affinity | TAP transport efficiency | NETCTL Prediction Score | MHC I Processing |           |           |            |
|----|--------------------|-------------------------|----------------|----------------------------------------------------------------------------------------|----------------------------------|---------------------------|------------------------------------------------|----------------------|------------------------------|--------------------------|-------------------------|------------------|-----------|-----------|------------|
|    |                    | HLA-A specific          | HLA-B specific |                                                                                        |                                  |                           |                                                |                      |                              |                          |                         | Proteasome       | Tap score | MHC score | MHC (IC50) |
| 1  | WTAGAAAYY          | -288.1                  | -              | HLA-B*15:01<br>HLA-B*35:01<br>HLA-A*68:01<br>HLA-A*30:02<br>HLA-A*26:01<br>HLA-A*01:01 | 0.15259                          | Strongly binds            | NETCTL, MHC Binding-I prediction               | 0.7953               | 0.9723                       | 2.779                    | 3.6616                  | 1.24             | 1.24      | -1.06     | 11.6       |
| 2  | CVADYSVLY          | -259.4                  | -              | HLA-B*35:01<br>HLA-A*68:01<br>HLA-A*30:02<br>HLA-A*26:01                               | 0.02757                          | Strongly binds            | NETCTL, MHC Binding-I prediction               | 0.6735               | 0.7339                       | 2.779                    | 3.1128                  | 1.51             | 1.38      | -1.39     | 24.4       |
| 3  | TSNQVAVLY          | -289                    | -              | HLA-B*57:01<br>HLA-A*68:01<br>HLA-B*35:01<br>HLA-B*58:01<br>HLA-A*30:02<br>HLA-A*01:01 | -0.01327                         | Strongly binds            | NETCTL, MHC Binding-I prediction, NET MHC Plan | 0.6559               | 0.944                        | 2.991                    | 3.0758                  | 1.47             | 1.3       | -1.83     | 68.1       |
| 4  | KTSVDCTMY          | -247.6                  | -              | HLA-A*01:01<br>HLA-A*30:02                                                             | -0.09595                         | Strongly binds            | NETCTL                                         | 0.5348               | 0.9764                       | 3.18                     | 2.5759                  | 1.26             | 1.31      | -1.61     | 41.1       |
| 5  | STECNLLL           | -183.6                  | -              | HLA-A*01:01                                                                            | -0.11115                         | Weakly binds              | NETCTL, EMBOSS                                 | 0.4908               | 0.9649                       | 3.016                    | 2.3795                  | 1.34             | 1.16      | -1.61     | 40.3       |
| 6  | LTDEMIAQY          | -211.7                  | -              | HLA-B*58:01<br>HLA-B*35:01<br>HLA-A*30:02<br>HLA-A*01:01                               | -0.20478                         | Weakly binds              | NETCTL, MHC Binding-I prediction               | 0.5136               | 0.8879                       | 0.703                    | 2.3492                  | 1.21             | 1.21      | -0.72     | 5.2        |

 126  
127  
128

 129  
130  
131  
132  
133  
134  
135  
136

Table S2: Identified T cell epitopes from IEDB tool for 2019-nCoV (NC\_045512.2\_prot\_YP\_009725301.1[M<sub>pro</sub>]) protein with protein-epitope interaction energies.

| No | Antigenic Peptides | Cluspro Lowest Energies |                | Allelic specificity MHC processing and NETMHC Plan                                     | MHC Class I Immunogenicity Score | NETMHC Plan Binding level | Antigenic Peptide selectivity                          | MHC Binding Affinity | C-Terminal Cleavage Affinity | TAP transport efficiency | NETCTL Prediction Score | MHC I Processing |           |           |            |
|----|--------------------|-------------------------|----------------|----------------------------------------------------------------------------------------|----------------------------------|---------------------------|--------------------------------------------------------|----------------------|------------------------------|--------------------------|-------------------------|------------------|-----------|-----------|------------|
|    |                    | HLA-A specific          | HLA-B specific |                                                                                        |                                  |                           |                                                        |                      |                              |                          |                         | Proteasome       | Tap score | MHC score | MHC (IC50) |
| 1  | SEDMLNPNY          |                         | -242.6         | HLA-B*44:02<br>HLA-B*44:03                                                             | -0.19953                         | Weakly binds              | NETCTL, MHC Binding-I prediction                       | 0.1528               | 0.8406                       | 2.676                    | 0.9088                  | 1.54             | 1.16      | -2.18     | 151.1      |
| 2  | TANPKTPKY          |                         | -254.6         | HLA-B*53:01<br>HLA-B*15:01<br>HLA-B*58:01<br>HLA-A*01:01<br>HLA-A*30:02<br>HLA-B*35:01 | -0.32208                         | Weakly binds              | NETCTL, MHC Binding-I prediction                       | 0.1676               | 0.9755                       | 2.723                    | 0.9942                  | 1.41             | 1.18      | -2.04     | 110.8      |
| 3  | QTFSVLACY          | -271.9                  |                | HLA-A*68:01<br>HLA-A*30:02<br>HLA-A*26:01                                              | -0.09719                         | Weakly binds              | NETCTL, MHC Binding-I prediction, NET MHC Plan         | 0.2625               | 0.9725                       | 2.998                    | 1.4104                  | 1.4              | 1.3       | -2.22     | 165.2      |
| 4  | GSVGFNIDY          | -341.8                  |                | HLA-A*30:02                                                                            | 0.28089                          | Strongly binds            | NETCTL                                                 | 0.3112               | 0.9565                       | 2.857                    | 1.6075                  | -                | -         | -         | -          |
| 5  | DYDCVSFCY          | -337.9                  |                | HLA-A*01:01                                                                            | -0.09528                         | Strongly binds            | NETCTL, EMBOSS                                         | 0.2097               | 0.9722                       | 2.706                    | 1.1717                  | -                | -         | -         | -          |
| 6  | GTDLEGNFY          | -228.9                  |                | HLA-A*30:02<br>HLA-A*01:01                                                             | 0.18838                          | Strongly binds            | NETCTL, MHC Binding-I prediction, NET MHC Plan         | 0.793                | 0.6229                       | 2.702                    | 3.5954                  | 1.42             | 1.17      | -0.99     | 9.7        |
| 7  | TVNVLAWLY          | -187.7                  |                | HLA-A*01:01                                                                            | 0.24595                          | Strongly binds            | NETCTL, MHC Binding-I prediction, NET MHC Plan, EMBOSS | 0.6255               | 0.8852                       | 2.957                    | 2.9365                  | 1.43             | 1.28      | -2.22     | 164.7      |
| 8  | LLEDEFTPF          |                         | -259.8         | HLA-B*15:01                                                                            | 0.2888                           | Strongly binds            | NETCTL, MHC Binding-I prediction, NET MHC Plan         | 0.1132               | 0.9503                       | 2.568                    | 0.7517                  | 0.94             | 1.11      | -2.09     | 121.8      |



### **Supplementary data files:**

**Supplementary data file S1:** List of 640 small molecule antiviral compounds obtained from the ChEMBL database with molecular descriptors. Binding affinity scores for both S protein and M<sub>pro</sub>. Best selected compounds from virtual screening of antiviral compounds with S protein and main protease with Autodock Vina scores. Description of the best-selected compounds (potent inhibitors for SARS-CoV-2) with clinical features, i.e., Treatments, clinical phase, and molecular descriptors. Binding affinities of clinically approved FDA antiviral drugs. ACE2-RBD complex binding affinity scores.

**Supplementary data file S2:** Key residues involved in active site pockets of S protein (PDB-ID 6VSB) and M<sub>pro</sub> (PDB-ID 6LU7) obtained from the CastP server.

**Supplementary data file S3:** MMPBSA analysis for M<sub>pro</sub>-PC786, M<sub>pro</sub>-JNJ, M<sub>pro</sub>-Lopinavir, S protein-PC786, S-protein-Zanamivir with binding free energies and residual contributions.

**Supplementary data file S4:** B cell epitope identification using BepiPred, Ellipro, and Discotope for S protein and main protease. Supplementary Table 1 (S1) Identified T cell epitopes from IEDB tool for NC\_045512.2\_prot\_YP\_009724390.1\_3 [S] protein with protein-epitope interaction energies (S2) Identified T cell epitopes from IEDB tool for SARS-CoV-2 (NC\_045512.2\_prot\_YP\_009725301.1[M<sub>pro</sub>] protein with protein-epitope interaction energies.
